# Supplementary material
Source: HighWire-hosted journal article supplement (https://bmjopen.bmj.com/content/9/1/e024096)
Supplement: inline-supplementary-material-1 [file inline-supplementary-material-1.pdf]

Design characteristics and statistical methods used in interrupted time series studies evaluating public health interventions: protocol for a review

Additional File 1: Data Extraction items.

| Item | Study Level                                          |
|------|------------------------------------------------------|
|      | <standard items such as author, title, journal etc.> |
| 1    | Why was an ITS study design/analysis chosen?         |
| 2    | Type of intervention                                 |
| 3    | Date/time of intervention(s)                         |
| 4    | Longer description of intervention                   |
| 5    | Number of study observations                         |
| 6    | Study observation notes                              |
| 7    | Main software used                                   |
| 8    | Additional software used                             |
| 9    | Software details                                     |
| 10   | Were there sample size calculations?                 |
| 11   | Sample size calculation details                      |

|    | Outcome Level                                          |
|----|--------------------------------------------------------|
| 12 | Outcome selection hierarchy                            |
| 13 | Further details of outcome selection                   |
| 14 | Any details about subpopulation                        |
| 15 | At the individual level, what was the outcome?         |
| 16 | What type of outcome is this?                          |
| 17 | Any further individual level details?                  |
| 18 | Text description of group level outcome                |
| 19 | What type of outcome is this?                          |
| 20 | Any further group level details?                       |
| 21 | Was this outcome standardised?                         |
| 22 | Any standardisation details?                           |
| 23 | Type of time interval                                  |
| 24 | Any details on time interval?                          |
| 25 | Was there any evidence of model pre-specification      |
| 26 | Any details of the pre-specification                   |
| 27 | Was the intervention time pre-specified?               |
| 28 | Any further intervention time details                  |
| 29 | Was a delay from intervention to its impact mentioned? |
| 30 | Was there a search for the time of impact?             |
| 31 | What was/were the time(s) of impact?                   |
| 32 | Details of how delayed impact was dealt with           |
| 33 | What general shape is the model?                       |
| 34 | Further notes on the shape of the model                |
| 35 | Statistical model used                                 |
| 36 | Further details of the statistical model               |

|    |                                                                 |
|----|-----------------------------------------------------------------|
| 37 | Is there any evidence of checking for model fit?                |
| 38 | Details of checking for model fit                               |
| 39 | Details on parameterisation                                     |
| 40 | Were there any additional analyses?                             |
| 41 | Details of further analyses                                     |
| 42 | What presentation was used for results                          |
| 43 | Was a graph included                                            |
| 44 | Is data from other groups available?                            |
| 45 | If other data was supplied please attach here                   |
| 46 | Please take a screenshot and attach the image of the graph here |
| 47 | Was autocorrelation mentioned                                   |
| 48 | How was autocorrelation detected                                |
| 49 | How was autocorrelation handled                                 |
| 50 | What was the estimate of autocorrelation parameter rho          |
| 51 | Any further details on autocorrelation                          |
| 52 | Was seasonality mentioned                                       |
| 53 | How was seasonality detected                                    |
| 54 | How was seasonality modelled                                    |
| 55 | Any further details on seasonality                              |
| 56 | Was non-stationarity mentioned                                  |
| 57 | Which test was used to detect non-stationarity                  |
| 58 | Any further details on non-stationarity                         |
| 59 | Were outliers mentioned                                         |
| 60 | What method was used to handle outliers                         |
| 61 | Any further details on outliers                                 |
| 62 | Was there a control group                                       |
| 63 | How was the control group incorporated?                         |
| 64 | Was there any forecasting                                       |

|    |                                                 |
|----|-------------------------------------------------|
|    | Effect measures                                 |
| 65 | Effect measure                                  |
| 66 | Further details on effect measure               |
| 67 | Metric                                          |
| 68 | Numeric value of effect measure                 |
| 69 | Lower confidence interval                       |
| 70 | Upper confidence interval                       |
| 71 | Standard deviation                              |
| 72 | p-value                                         |
| 73 | Notes on the effect measure                     |
| 74 | Was there any mention of a ceiling/floor effect |
| 75 | Details of the ceiling/floor effect             |

|    |                                                    |
|----|----------------------------------------------------|
|    | Segments                                           |
| 76 | Segment number                                     |
| 77 | Segment description                                |
| 78 | What type of time interval is used in this segment |
| 79 | Is the timing of the segment clearly defined       |
| 80 | How many intervals are in the segment              |
| 81 | How many observations are in the segment           |
| 82 | Please summarise any further segment details...    |
